# Supplementary material for: A simple and sensitive LC-ICP-MS method for the accurate determination of vitamin B12 in fortified breakfast cereals and multivitamin tablets
Source: Royal Society of Chemistry journal article supplement (doi:10.1039/c3ja30383g), 2013-01-01
Supplement: c3ja30383g.pdf [file c3ja30383g.pdf]

Supplemental Table 1. Instrumental parameters for the determination of Co in cyanocobalamin.

| Parameter                 | Value                      |
|---------------------------|----------------------------|
| RF Power                  | 1500 W                     |
| Plasma flow               | 15 L/min                   |
| Auxiliary flow            | 0.9 L/min                  |
| Carrier flow              | 1.05 L/min                 |
| Makeup gas flow           | 0.1 L/min                  |
| Nebulizer                 | PFA microflow 0.1 mL/min   |
| Spray chamber             | PFA Scott type double pass |
| Spray Chamber Temperature | 2 °C                       |
| Integration time/point    | 0.1 s                      |
| Integration points/mass   | 3                          |
| Repetition                | 50                         |

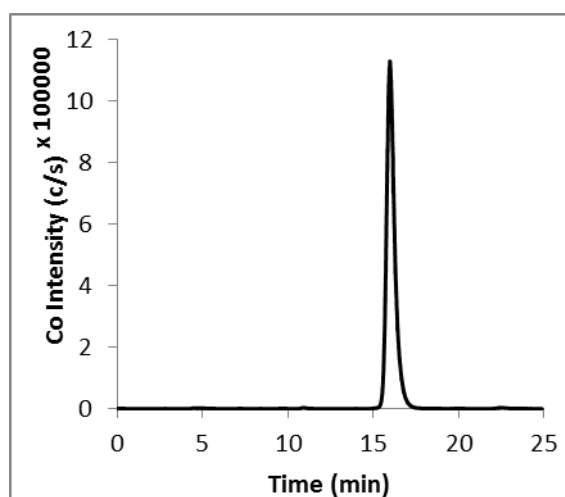

Supplemental Figure 1. A Chromatogram of a commercial cyanocobalamin (1000 ng/g)

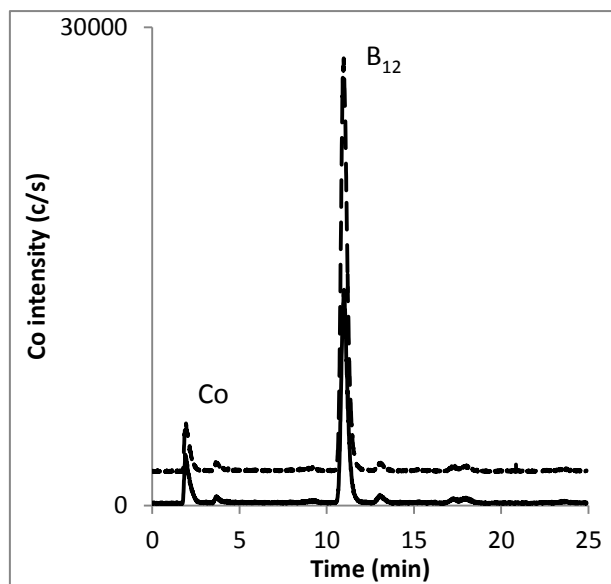

Supplemental Figure 2. Co and vitamin B<sub>12</sub> determination from SRM 3280 (multivitamin tablets SRM). The solid line represents unspiked; dashed line represents spiked sample.
